# Supplementary material for: Ritorno a Dial M for Murder: il delitto perfetto del 3D
Source: Royal Society of Chemistry journal article supplement (doi:10.1039/c3cc00299c), 2013-01-01
Supplement: c3cc00299c.pdf [file c3cc00299c.pdf]

# **A Second-order Nonlinear Optical Material with Hydrated Homochiral Helix via Spontaneous Symmetric Breaking Crystallization from an Achiral Ligand**

*Qingxiang Yang,<sup>a</sup> Zhijun Chen,<sup>b</sup> Jinsong Hu,<sup>a</sup> Ying Hao,<sup>b</sup> Yizhi Li,<sup>a</sup> Qingyi Lu,<sup>a</sup> Hegen Zheng<sup>\*a</sup>*

*<sup>a</sup> State Key Laboratory of Coordination Chemistry, School of Chemistry and Chemical Engineering, National Laboratory of Microstructures, Nanjing University, Nanjing 210093, P.R. China. Fax: 86-25-83314502;*

*<sup>b</sup>School of Material and Chemical Engineering, Zhengzhou University of Light Industry, Zheng Zhou 450002, P. R. China.*

## EXPERIMENTAL SECTION

**Materials and Methods.** The reagents and solvents employed were commercially available and used as received. IR absorption spectra of the compounds were recorded in the range of 400–4000  $\text{cm}^{-1}$  on a Nicolet (Impact 410) spectrometer with KBr pellets (5 mg of sample in 500 mg of KBr). C, H, and N analyses were carried out with a Perkin–Elmer 240C elemental analyzer. Powder X-ray diffraction (PXRD) measurements were performed on a Bruker D8 Advance X-ray diffractometer using Cu–K $\alpha$  radiation ( $\lambda = 1.5418 \text{ \AA}$ ), in which the X-ray tube was operated at 40 kV and 40 mA. The as-synthesized samples were characterized by thermogravimetric analysis (TGA) on a Perkin Elmer thermogravimetric analyzer Pyris 1 TGA up to 1023 K using a heating rate of 10  $\text{K min}^{-1}$  under  $\text{N}_2$  atmosphere. Luminescent spectra were recorded with a SHIMAZU VF-320 X-ray fluorescence spectrophotometer at room temperature. The powder samples (50mg) were ground and sieved into particle size ranges (< 40, 40-75, 75-105, 105-145, 145-205, 205-260, and 260-335  $\mu\text{m}$ ). The sieved urea powders were used as reference materials to assume the effect. A pulsed Q-switched Nd:YAG laser at a wavelength of 1064 nm was used to generate a SHG signal. The backscattered SHG light was collected by a spherical concave mirror and passed through a filter that transmits only 532 nm radiation.

**Syntheses of Compound 1.** A mixture of  $\text{Cd}(\text{NO}_3)_2 \cdot 4\text{H}_2\text{O}$  (30.1 mg, 0.1 mmol), imidazole (6.8 mg, 0.1 mmol) and  $\text{H}_2\text{L}$  (25.7 mg, 0.1 mmol) was dissolved in 4.5 mL of DMF/ $\text{H}_2\text{O}$ (1:8, v/v). The final mixture was placed in a Parr Teflon-lined stainless steel vessel (15 mL) under autogenous pressure and heated at 85  $^\circ\text{C}$  for 3 d. after cooled to room temperature, the solid was filtered and the solution was static evaporated at room temperature for three days, then pale yellow crystals were

obtained, which were washed with mother liquid, and dried under ambient conditions (Yield: 40% based on H<sub>2</sub>L). Anal. Calcd for C<sub>37</sub>H<sub>55</sub>O<sub>19</sub>N<sub>5</sub>Cd<sub>2</sub>: C, 40.41, H, 5.01, N, 6.37; found C, 40.34, H, 5.03, N, 6.35.

**Crystal Structure Determination.** X-ray crystallographic data of **1** was collected at room temperature using epoxy-coated crystals mounted on glass fiber. All measurements were made on a Bruker Apex Smart CCD diffractometer with graphite-monochromated Mo-K<sub>α</sub> radiation ( $\lambda = 0.71073 \text{ \AA}$ ). The structures of compounds **1** was solved by direct methods, and the non-hydrogen atoms were located from the trial structure and then refined anisotropically with SHELXTL using full-matrix least-squares procedures based on F<sup>2</sup> values.<sup>21</sup> The hydrogen atom positions were fixed geometrically at calculated distances and allowed to ride on the parent atoms. The relevant crystallographic data are presented in Table S1, while the selected bond lengths and angles are given in Supporting Information, Table S2.

**Table S1.** Crystallographic Data for Compound 1

| Formula                                       | $C_{37}H_{55}Cd_2N_5O_{19}$ |
|-----------------------------------------------|-----------------------------|
| Formula Weight                                | 1098.66                     |
| Crystal System                                | monoclinic                  |
| Space group                                   | $P2_1$                      |
| a (Å)                                         | 9.6120(10)                  |
| b (Å)                                         | 16.4062(17)                 |
| c (Å)                                         | 14.7042(15)                 |
| $\alpha$ (deg)                                | 90                          |
| $\beta$ (deg)                                 | 104.0780(10)                |
| $\gamma$ (deg)                                | 90                          |
| $V$ (Å <sup>3</sup> )                         | 2249.2(4)                   |
| Z                                             | 2                           |
| $D_c$ (g cm <sup>-3</sup> )                   | 1.662                       |
| $\mu$ (Mo) Ka(mm <sup>-1</sup> )              | 1.026                       |
| F(000)                                        | 1120                        |
| R(int)                                        | 0.0286                      |
| Observed data                                 | 6532                        |
| [ $I > 2\sigma(I)$ ]                          |                             |
| R1, wR2 [ $I > 2\sigma(I)$ ]                  | 0.0345, 0.0986              |
| S                                             | 1.026                       |
| Min. and Max.<br>Resdens (e·Å <sup>-3</sup> ) | -1.209, 2.292               |
| Absolute structure<br>parameter               | 0.00(3)                     |

**Table S2.** Selected Bond Lengths (Å) and Angles (deg) for Compound **1**

| Compound <b>1</b> |            |               |            |
|-------------------|------------|---------------|------------|
| Cd1-O1            | 2.417(4)   | Cd1-O2        | 2.409(4)   |
| Cd1-O3#1          | 2.345(4)   | Cd1-O4#1      | 2.427(4)   |
| Cd1-O9            | 2.296(5)   | Cd1-O10       | 2.272(4)   |
| Cd1-O13           | 2.333(5)   | Cd2-O5        | 2.414(5)   |
| Cd2-O6            | 2.374(4)   | Cd2-O7#1      | 2.390(4)   |
| Cd2-O8#1          | 2.393(4)   | Cd2-O11       | 2.264(4)   |
| Cd2-O12           | 2.297(4)   | Cd2-O14       | 2.269(4)   |
| O10-Cd1-O9        | 89.13(16)  | O10-Cd1-O13   | 81.98(15)  |
| O9-Cd1-O13        | 170.48(14) | O10-Cd1-O3#1  | 139.33(14) |
| O9-Cd1-O3#1       | 94.92(18)  | O10-Cd1-O3#1  | 94.06(17)  |
| O10-Cd1-O2        | 138.30(14) | O9-Cd1-O2     | 97.58(18)  |
| O13-Cd1-O2        | 86.91(17)  | O3#1-Cd1-O2   | 81.27(12)  |
| O10-Cd1-O1        | 86.07(15)  | O9-Cd1-O1     | 84.97(15)  |
| O13-Cd1-O1        | 90.99(16)  | O3#1-Cd1-O1   | 134.59(14) |
| O1-Cd1-O2         | 53.95(14)  | O10-Cd1-O4#1  | 85.46(14)  |
| O9-Cd1-O4#1       | 89.36(18)  | O13-Cd1-O4#1  | 93.32(19)  |
| O3#1-Cd1-O4#1     | 54.22(12)  | O2-Cd1-O4#1   | 135.43(12) |
| O1-Cd1-O4#1       | 169.87(14) | O11-Cd2-O14   | 173.22(17) |
| O11-Cd2-O12       | 89.87(18)  | O14-Cd2-O12   | 86.76(18)  |
| O11-Cd2-O6        | 92.32(16)  | O14-Cd2-O6    | 93.19(16)  |
| O12-Cd2-O6        | 84.23(17)  | O11-Cd2-O7#1  | 98.20(16)  |
| O14-Cd2-O7#1      | 80.82(16)  | O12-Cd2-O7#1  | 140.64(14) |
| O6-Cd2-O7#1       | 133.37(17) | O11-Cd2-O8#1  | 86.01(15)  |
| O14-Cd2-O8#1      | 87.97(16)  | O12-Cd2-O8#1  | 87.57(16)  |
| O6-Cd2-O8#1       | 171.6(2)   | O7#1-Cd2-O8#1 | 54.99(16)  |

|             |            |             |            |
|-------------|------------|-------------|------------|
| O11-Cd2-O5  | 90.97(19)  | O14-Cd2-O5  | 95.5(2)    |
| O12-Cd2-O5  | 138.69(15) | O6-Cd2-O5   | 54.48(17)  |
| O7#1-Cd2-O5 | 79.93(14)  | O8#1-Cd2-O5 | 133.68(16) |

$$\#1 = x-1, y, z-1$$

**Table S3.** Specified Hydrogen Bonds of Compound **1**

| D-H-A            | d(D...H)( $\text{\AA}$ ) | d(H...A)( $\text{\AA}$ ) | d(D...A)( $\text{\AA}$ ) | (DHA)(deg) |
|------------------|--------------------------|--------------------------|--------------------------|------------|
| N3-H3A-O17 #1    | 0.86                     | 2.09                     | 2.948(7)                 | 172        |
| N4-H4A-O16 #2    | 0.86                     | 2.33                     | 3.156(4)                 | 160        |
| O9-H9A-O5 #3     | 0.85                     | 2.19                     | 2.733(4)                 | 122        |
| O9-H9B-O7 #2     | 0.85                     | 2.05                     | 2.769(5)                 | 143        |
| O10-H10A-O6 #4   | 0.96                     | 2.09                     | 2.740(4)                 | 123        |
| O10-H10B-O18 #5  | 0.96                     | 1.88                     | 2.785(4)                 | 156        |
| O11-H11A-O3 #6   | 0.85                     | 2.06                     | 2.739(3)                 | 136        |
| O11-H11C-O2 #7   | 0.85                     | 2.11                     | 2.754(5)                 | 132        |
| O12-H12B-O19 #7  | 0.85                     | 1.95                     | 2.796(4)                 | 177        |
| O12-H12C-O4 #8   | 0.85                     | 1.90                     | 2.744(7)                 | 173        |
| O16-H16C-O15 #5  | 0.85                     | 2.37                     | 2.798(4)                 | 111        |
| O16-H16C-O1 #9   | 0.85                     | 2.42                     | 2.957(4)                 | 122        |
| O17-H17A-O15 #10 | 0.85                     | 2.36                     | 2.901(5)                 | 122        |
| O17-H17B-O8 #4   | 0.85                     | 2.27                     | 2.850(5)                 | 126        |
| O18-H18B-O7 #11  | 0.85                     | 1.99                     | 2.775(7)                 | 152        |
| O18-H18B-O14 #12 | 0.85                     | 2.66                     | 3.140(4)                 | 117        |

|                |      |      |          |     |
|----------------|------|------|----------|-----|
| O19-H19D-O2    | 0.85 | 2.06 | 2.909(5) | 179 |
| O19-H19A-O18#2 | 0.85 | 2.19 | 2.873(6) | 138 |

(#1)  $-x+1, y+1/2, -z+1$ ; (#2)  $-x+1, y-1/2, -z+1$ ; (#3)  $-x, y-1/2, -z$ ; (#4)  $x-1, y-1, z$ ; (#5)  $-x, y-1/2, -z+1$ ; (#6)  $x-1, y+1, z-1$ ; (#7)  $x, y+1, z$ ; (#8)  $x, y+1, z-1$ ; (#9)  $-x, y+1/2, -z+1$ ; (#10)  $x, y-1, z$ ; (#11)  $x-1, y, z$ ; (#12)  $x, y, z+1$ .

**Scheme S1.** The Rigid and Flexible V-shaped Polycarboxylate Ligands

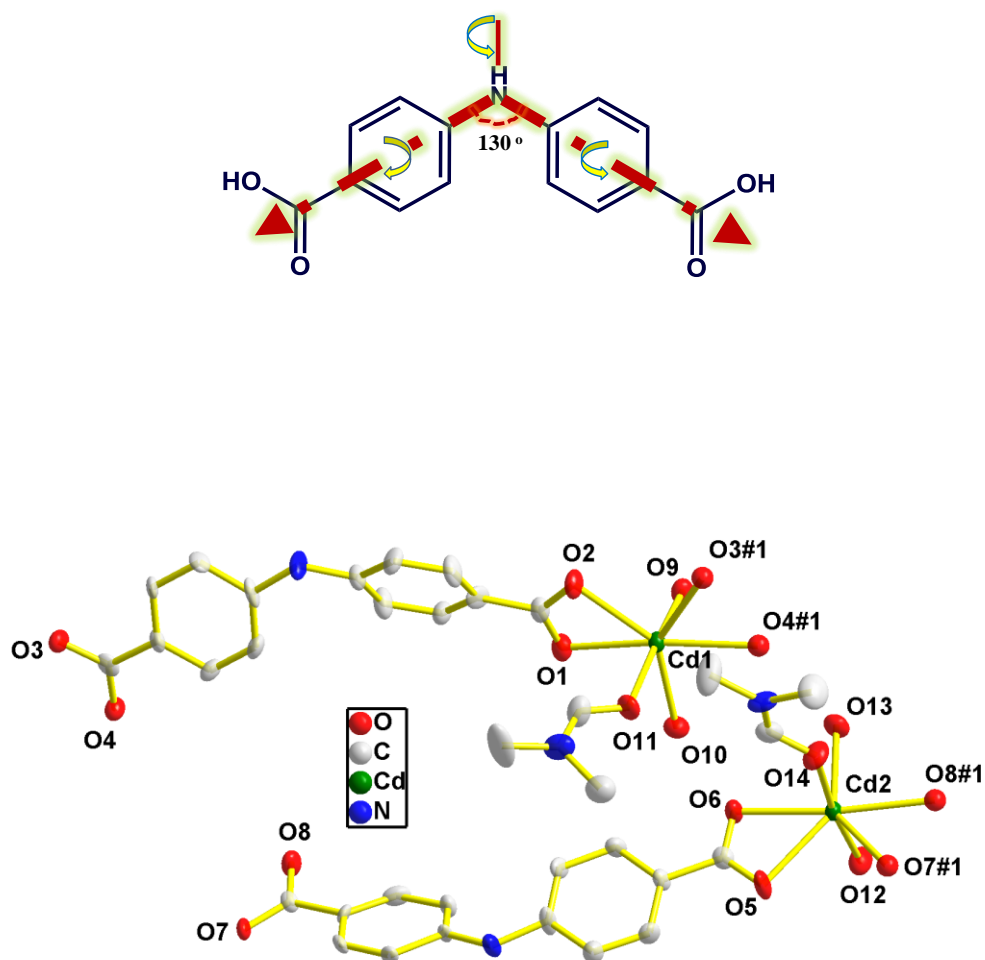

**Figure S1.** Coordination environment of Cd(II) ions in **1**. The hydrogen atoms are omitted for clarity (30% ellipsoid probability). Symmetry codes: (#1)  $-1+x, y, -1+z$ .

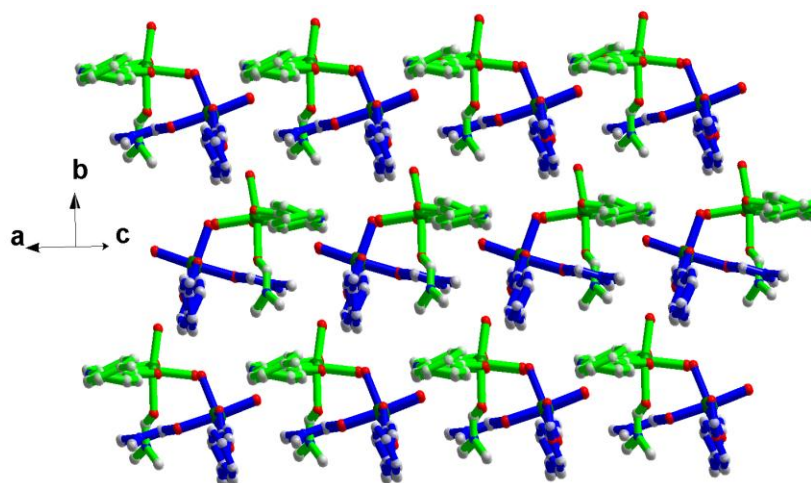

**Figure S2.** The arrangement of linear chains in **1**.

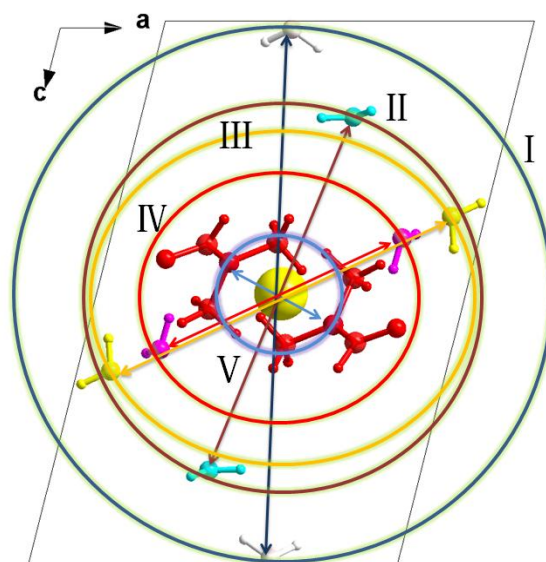

**Figure S3.** The helical arrangement of water and DMF molecules see from the **b** axis direction.



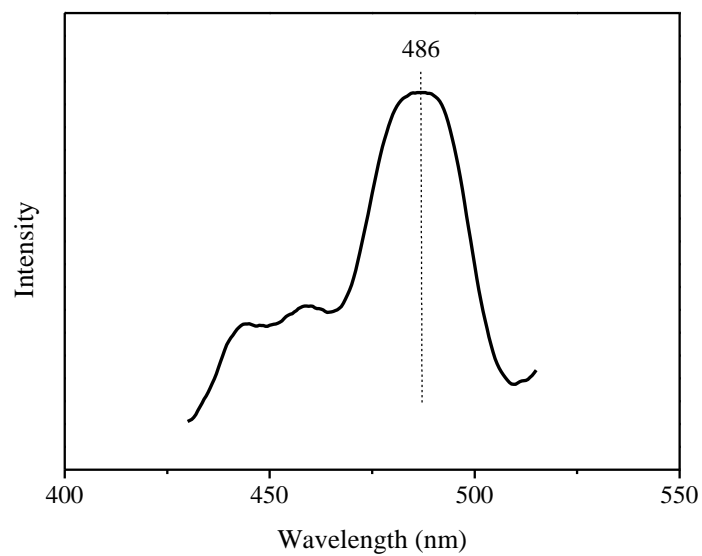

**Figure S4.** Solid-state photoluminescent spectra of **1**.

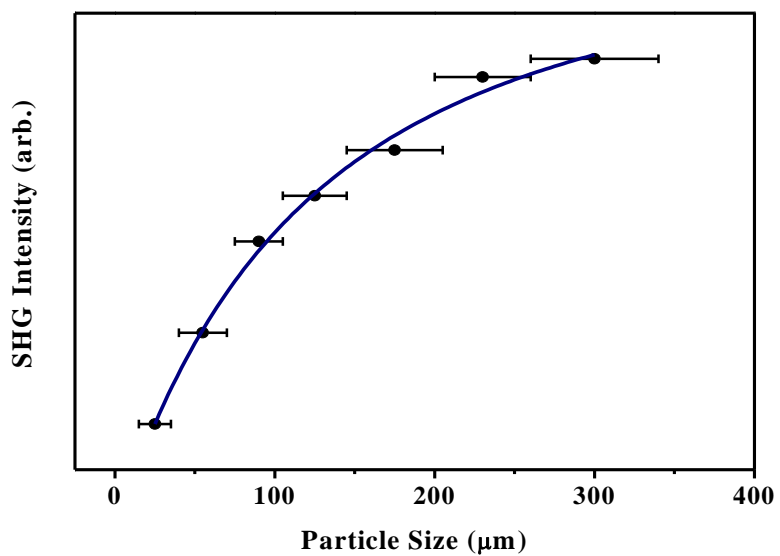

**Figure S5.** Phase-matching curve for **1**. The curve drawn is to guide the eye and not a fit to the data.

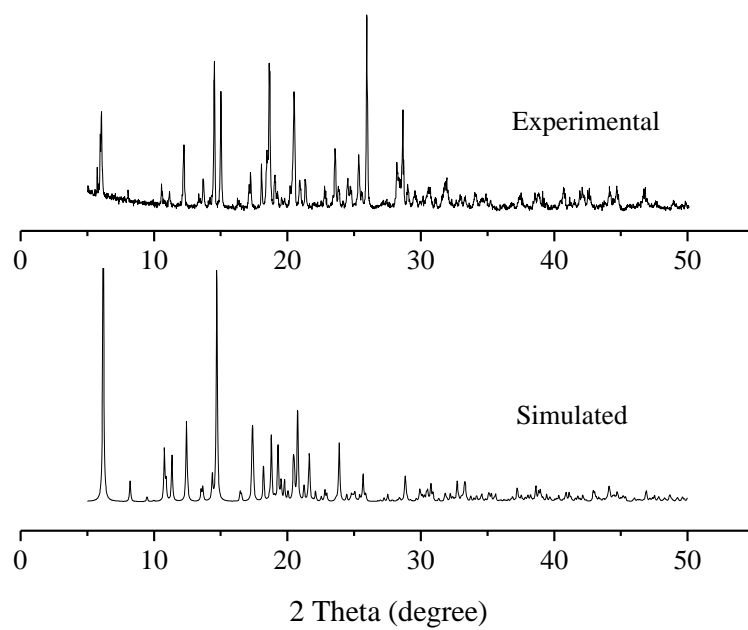

**Figure S6.** Powder X-ray diffraction patterns of **1**.

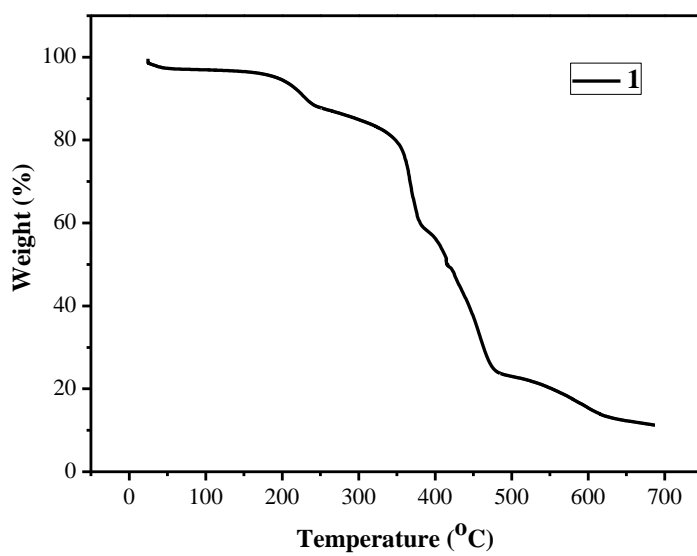

**Figure S7.** TG plots of **1**.

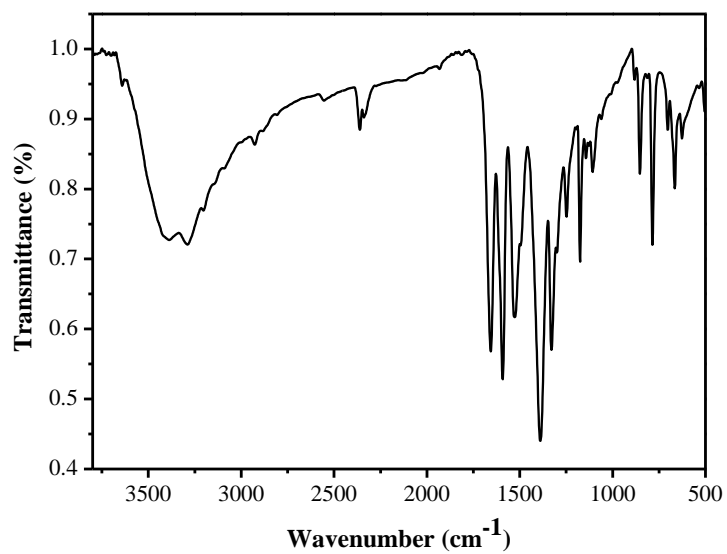

**Figure S8.** IR spectra of **1** at room temperature.
